# Supplementary material for: Long-term pig manure application increases soil organic carbon through aggregate protection and Fe-carbon associations in a subtropical Red soil (Udic Ferralsols)
Source: Copernicus journal article supplement (doi:10.5194/egusphere-2025-2405), 2025-06-25
Supplement: Supplementary file 1 [file Supplementary Material.docx]

**Calculation of carbon inputs from pig manure**:
Annual C input (Mg C ha⁻¹) = (Manure application rate, kg N ha⁻¹) / (Manure N content, g kg⁻¹) × (Manure C content, g kg⁻¹) × 10⁻³
*Example for LM treatment*:
(150 kg N ha⁻¹) / (36.2 g N kg⁻¹) × 386.5 g C kg⁻¹ × 10⁻³ = 1.6 Mg C ha⁻¹
