# Supplementary material for: Long-term pig manure application increases soil organic carbon through aggregate protection and Fe-carbon associations in a subtropical Red soil (Udic Ferralsols)
Source: Copernicus journal article supplement (doi:10.5194/egusphere-2025-2405), 2025-06-25
Supplement: Supplementary file [file egusphere-2025-2405-AC1-supplement.pdf]

Lines 722-724:

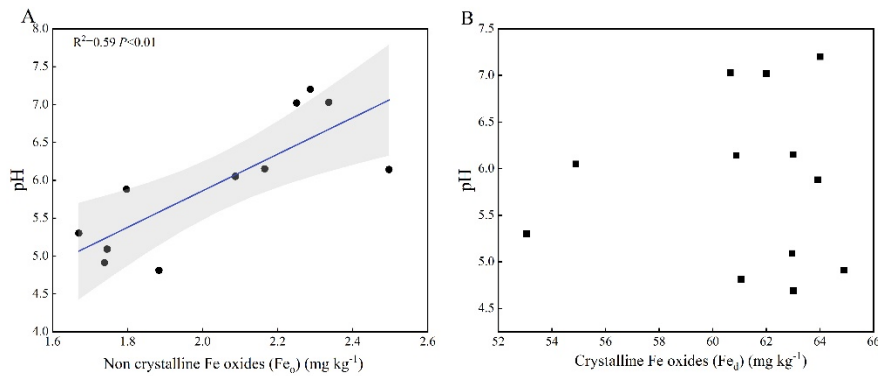

**Fig. 4** Relationship between soil pH and iron oxides concentrations. (A) Significant positive correlation between pH and amorphous iron oxides ( $Fe_o$ ). (B) No significant correlation between pH and crystalline iron oxides ( $Fe_a$ ).

Lines 368-373: “Previous studies have demonstrated that organic amendments can enhance the content of non-crystalline Fe oxides, thereby promoting Fe-C associations (Chen et al., 2022; Huang et al., 2017; Wang et al., 2019). Extending these findings, our results provide new mechanistic insight by demonstrating that the increase in non-crystalline Fe oxides is closely linked to manure-induced soil alkalization. Specifically, the significant positive correlation between pH and  $Fe_o$  indicates that the...”

Line701-702:

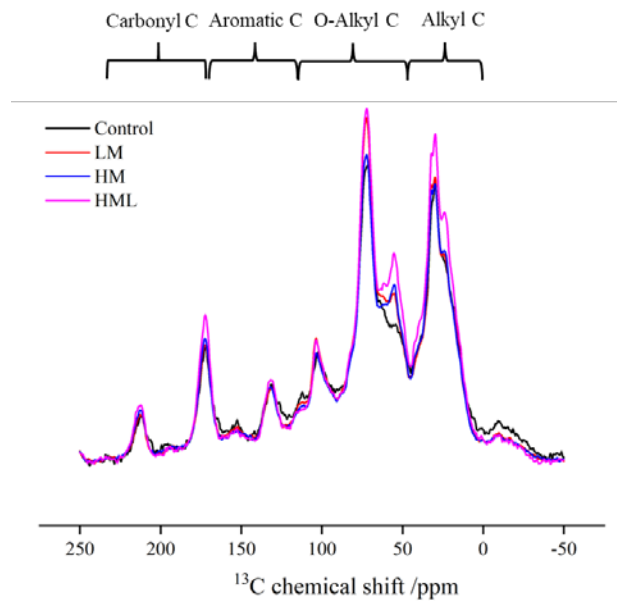

**Fig.1** CPMAS- $^{13}C$ -NMR spectra under no manure (Control), low manure (LM), high manure (HM) and high manure plus lime (HML) treatments. Alkyl (0-45 ppm); O-alkyl C (45-110 ppm); aromatic C (110-160 ppm) and carbonyl C (160-220 ppm). The spectra are normalized to the total integral area of the control spectrum to highlight differences in the relative abundances of carbon functional groups.
